1 **Performances of targeted RNA-sequencing for the analysis of fusion transcripts,**  
2 **gene mutation and expression in haematological malignancies.**

3  
4 Sandrine Hayette<sup>1,2,7</sup>, Béatrice Grange<sup>1</sup>, Maxime Vallee<sup>3</sup>, Claire Bardel<sup>3,4</sup>, Sarah Huet<sup>1,2</sup>,  
5 Isabelle Mosnier<sup>1</sup>, Kaddour Chabane<sup>1</sup>, Thomas Simonet<sup>3</sup>, Marie Balsat<sup>5</sup>, Maël Heiblig<sup>5</sup>,  
6 Isabelle Tigaud<sup>1,7</sup>, Franck E. Nicolini<sup>6,7</sup>, Sylvain Mareschal<sup>2</sup>, Gilles Salles<sup>2,5</sup>, Pierre  
7 Sujobert<sup>1,2</sup>

8  
9 1. Hospices Civils de Lyon, Hôpital Lyon Sud, Service d'hématologie biologique, Pierre-  
10 Bénite, France

11 2. Cancer Research Center of Lyon, INSERM U1052 UMR CNRS 5286, Equipe labellisée  
12 Ligue Contre le Cancer, Université de Lyon, Lyon, France

13 3. Hospices Civils de Lyon, Plateforme de séquençage NGS - HCL, cellule bioinformatique,  
14 Bron, France

15 4. Université de Lyon, Université Lyon 1, CNRS, Laboratoire de Biométrie et Biologie  
16 Evolutive UMR 5558, Lyon, France

17 5. Hospices Civils de Lyon, Hôpital Lyon Sud, Service d'hématologie clinique, Pierre-Bénite,  
18 France

19 6. Hematology department and INSERM U1052, CRCL, Centre Léon Bérard, Lyon, France

20 7. French group of CML, Centre Léon Bérard, Lyon, France

21  
22 Corresponding author:

23 Dr. Pierre Sujobert

24 pierre.sujobert@chu-lyon.fr

25

26 Service d'hématologie biologie, Hôpital Lyon Sud

27 165 chemin du grand revoyet. 69365 Pierre Bénite

28

29 phone: +33(0)6 64 77 59 12

30 fax: +33(0)478864104

31

32 Running title: Targeted RNA-seq in haematology

33 Number of words: Abstract: 184, main text: 2356

34 Number of Tables: 0

35 Number of Figures: 4

36 Supplemental Tables: 3

37 Conflict of interest disclosure: the authors do not have any conflict of interest to disclose

38

39 **Abstract**

40 RNA sequencing holds great promise to improve the diagnostic of haematological  
41 malignancies, because this technique enables to detect fusion transcripts, to look for  
42 somatic mutations in oncogenes, and to capture transcriptomic signatures nosological  
43 entities. However, the analytical performances of targeted RNA sequencing have not  
44 been extensively described in diagnostic samples. Using a targeted panel of 1385 cancer-  
45 related genes in a series of 100 diagnosis samples and 8 controls, we detected all the  
46 already known fusion transcripts, and also discovered unknown and/or unsuspected  
47 fusion transcripts in 12 samples. Regarding the analysis of transcriptomic profiles, we  
48 show that targeted RNA sequencing is performant to discriminate acute lymphoblastic  
49 leukemia entities driven by different oncogenic translocations. Additionally, we show  
50 that 86% of the mutations identified at the DNA level are also detectable at the mRNA  
51 level, except for nonsense mutations which are subjected to mRNA decay. We conclude  
52 that targeted RNA sequencing might improve the diagnosis of haematological  
53 malignancies. Standardization of the preanalytical steps and further refinements of the  
54 panel design and of the bioinformatical pipelines will be an important step towards its  
55 use in standard diagnostic procedures.

56

## 57 **Introduction**

58 In haematological malignancies as in cancer in general, the goal of the diagnosis  
59 procedures is not only to accurately classify the patient's disease according to the  
60 consensual WHO guidelines<sup>1</sup>, but also to identify biomarkers of prognostic or predictive  
61 values. A part of this information can be captured by morphology and  
62 immunophenotyping, but it relies more and more on the analysis of the genomic  
63 alterations of the neoplastic cells<sup>2</sup>. Nowadays, conventional cytogenetics and targeted  
64 sequencing of relevant genes are still the standard procedures. However, technological  
65 outbreaks such as whole genome sequencing, ATAC-sequencing or RNA sequencing  
66 (RNA-seq) might refine the diagnosis by unravelling genomic alterations outside coding  
67 regions<sup>3</sup>, epigenetic signatures<sup>4,5</sup> and gene expression profiles respectively<sup>6</sup>.

68  
69 In this study, we have chosen to assess the diagnostic value of RNA-seq, because this  
70 technique allows to explore three levels of genetic information: gene sequence, gene  
71 fusions, and gene expression. Interestingly, each of these different levels of analysis  
72 brings independent information about the neoplastic cell, and accordingly their  
73 integration should refine the precision of the diagnosis. For example, acute myeloid  
74 leukaemia (AML) patients prognosis is evaluated by cytogenetics (copy number  
75 abnormalities and structural variants), further refined by the analysis of the mutational  
76 status of a few genes, and could maybe be improved by transcriptomic signatures such  
77 as the LSC17 which is a proxy of the number of leukemic stem cells<sup>7</sup>.

78  
79 Different techniques of library preparation for RNA-seq have been described, enabling  
80 the analysis of all the RNA molecules of a sample, or using enrichment step to target  
81 genes of interest such as messenger RNA, or small RNA species. Of note, the choice of the

82 library preparation should optimize the balance between the number of targets of  
83 interest and the required depth of sequencing, in order to remain economically  
84 affordable in a routine setting. To date, most of the genes involved in cancer have been  
85 already identified by large programs of whole exome sequencing<sup>8</sup>. Based on these  
86 considerations, we have decided to evaluate the performances of a targeted RNA-seq  
87 panel of 1385 genes involved in cancer biology. We present here the analytical  
88 performances of targeted RNA-seq to detect fusion transcripts, to identify  
89 transcriptional profiles associated with clinically relevant entities, and to detect the  
90 recurrent mutations with clinical significance in haematological malignancies.

91

92

93

## 94 **Material and methods**

### 95 **Samples**

96 One hundred diagnosis samples from patients with the following haematological  
97 malignancies were included: acute leukaemia (acute myeloid leukaemia (AML), n=51  
98 including 7 acute promyelocytic leukaemias (APL), B-cell acute lymphoblastic leukaemia  
99 (B-ALL, n=27), mixed phenotype acute leukaemia (n=1), T-cell acute lymphoblastic  
100 leukaemia (T-ALL, n=1)), myeloproliferative neoplasms (chronic myeloid leukaemia  
101 (CML, n=12) and other myeloproliferative neoplasms (n=2)), hypereosinophilic  
102 syndromes (HES, n=3)), chronic myelomonocytic leukemia (CMML, n=2) and  
103 myelodysplastic syndrome with multilineage dysplasia (n=1). These samples were  
104 chosen to enrich the cohort in fusion transcript due to chromosomal translocations,  
105 based on the results of conventional cytogenetics, in order to test the performances of  
106 targeted RNA-seq to detect fusion transcripts. Moreover, we used four controls (C1 to  
107 C4) prepared by pooling blood samples from 5 healthy donors for each, and four bone  
108 marrow samples from healthy donors. The characteristics of the samples are provided in  
109 supplemental Table 1. The procedures followed were in accordance with the Helsinki  
110 declaration, as revised in 2008.

111 Cytogenetic R and G-banding analyses were performed according to standard methods.  
112 The definition of a cytogenetic clone and description of karyotypes followed the current  
113 International System for Human Cytogenetic Nomenclature.

114 For a subset of samples (n=45), the analysis of a panel of 105 genes was already  
115 performed for routine diagnostic procedures, as already described<sup>9</sup>.

### 116 **RNA extraction**

117 Three different protocols of RNA extraction were used (supplemental Table 1). For ALL  
118 samples and 3 bone marrow samples from healthy donors, RNA was extracted with

119 Trizol reagent (TRIZ: Invitrogen, Carlsbad, CA, USA). For AML samples RNA was  
120 extracted with NucleoSpin RNA kit (MN: Macherey Nagel, Düren, Germany). For CML,  
121 HES, CMML and MDS samples, RNA was extracted with MN or the Maxwell 16LEV  
122 simplyRNA Blood Kit (Max: Promega, Madison, WI, USA). For control samples C1 to C4,  
123 RNA was extracted after Ficoll enrichment with either Trizol or MN methods, in order to  
124 assess the effect of extraction protocol on transcriptomic analysis performances.

### 125 **RNA sequencing**

126 Library preparation for NGS sequencing was performed using TruSight RNA Pan-Cancer  
127 Panel (Illumina, SanDiego, CA, USA) targeting 1385 genes involved in cancer biology.  
128 Libraries from 16 samples were multiplexed and sequenced on a Nextseq 500 device  
129 with a 2x81 paired-end run on a mid-output flowcell according to the manufacturer's  
130 instructions (mean number of reads by sample:  $32.10^6$ ; range 20 to  $59.10^6$ ).

### 131 **Bioinformatical analysis**

132 After demultiplexing, adapter sequences were trimmed with Cutadapt and reads were  
133 mapped to the human genome (GRCh37). The detection of gene fusions was performed  
134 first with the commonly used STAR-Fusion pipeline (parameters: --FusionInspector  
135 validate) and STAR-2pass<sup>10</sup>, and all the negative samples were reanalysed with the  
136 recently launched nf-Core<sup>11</sup> and Arriba (<https://github.com/suhrig/arriba/>) pipelines.  
137 Putative fusions were validated by reverse transcription and polymerase chain reaction  
138 (primers sequences are provided in supplemental Table 2). Gene expression analysis  
139 (after trimmed mean of M values (TMM) normalization), principal Component Analysis  
140 (PCA), k-means clustering, two tailed t-test and Heat Map generation followed by  
141 hierarchical clustering were performed using Omics Explorer software (Qlucore AB,  
142 Lund, Sweden). For gene mutation analysis on RNAseq data, we looked at all the  
143 mutations found at the DNA level by combining the same homemade workflow as for

144 DNA, and visual inspection of the BAM files in case of unfound mutation. In brief we first  
145 gather the variant alleles called with Freebayes and Varscan2<sup>12,13</sup>. Among this raw set,  
146 we kept alleles whose read frequency was either above 20%, or for those below, if their  
147 frequency was more than 5 fold the median of the frequencies of all the samples from  
148 the same run. A second filtering step was applied to get rid of variants whose occurrence  
149 was above 1% in GnomAD mixed populations<sup>14</sup>.

150

151

152



## 153 **Results**

### 154 **Identification of fusion transcripts**

155 Fusion transcript positivity threshold was determined by the detection of at least one  
156 junction read and one spanning read between two different genes. All putative new  
157 fusion transcripts have been validated by PCR. All of the 57 rearrangements identified  
158 by cytogenetics or molecular biology were identified by targeted RNA-seq (Figure 1).  
159 Notably, RNA-seq detected all the *BCR-ABL1* canonical and rare transcripts (e13a2  
160 (n=2); e14a2 (n=5); e1a2 (n=4); e1a3 (n=2); e6a2 (n=1); e13a3 (n=3); and e19a2(n=2)),  
161 as well as all the *PML-RARA* transcripts (BCR1 (n=2) BCR2 (n=2); BCR3(n=3)) and *MLL*  
162 (*KMT2A*) fusions (n=19). Of note, two samples with *FIP1L1-PDGFR*A fusion transcripts  
163 and one with *KMT2A* duplication were missed when analysed with the STAR-fusion  
164 pipeline, but recovered with nf-core and Arriba bioinformatics pipelines.

165 Eighteen samples had a chromosomal translocation without detected fusion transcript  
166 based on routine molecular biology. In 5 patients, targeted RNA-seq identified a fusion  
167 transcript already described in the literature (*KAT6-CREBP*, *NPM1-MLF1*, *PCM1-JAK2*,  
168 *DEK-NUP214*, *ZMYND11-MBTD1*<sup>15</sup>) (Figure 1). In two additional patients, a new fusion  
169 transcript was identified and confirmed by RT-PCR and Sanger sequencing (*FUS-FEV*;  
170 *EEA1-PDGFRB*). These fusion transcript were in frame, probably leading to the  
171 expression of an abnormal fusion protein (Figure 2A and B). No evidence of fusion  
172 transcript was found in the 11 remaining samples.

173 Finally, we detected a fusion transcript in five samples without detectable translocation  
174 on conventional cytogenetics: *SET-NUP214*, *EP300-ZNF384*, *KMT2A-MLLT4*, *KMT2A-*  
175 *MLLT10*, *VWC2-IKZF1* (Figure 1). The *VWC2-IKZF1* fusion transcript (Figure 2C), never  
176 described so far, was detected in an acute lymphoblastic leukemia with a t(9;22) leading  
177 to the expression of the *BCR-ABL1*-transcript (patient 10, supplemental data Table 1).

178 We hypothesize that this fusion might represent a new mechanism of *IKZF1* gene  
179 inactivation recurrently identified in Phi+-ALL<sup>16,17</sup>.

180 As it was previously described in non-cancer tissues and cells<sup>18</sup>, several fusions with  
181 open reading frame were also detected in control and patients' samples. Some of them  
182 such as *TFG-GPR128*, *POLE-FUS* or *OAZ1-DOT1* were expressed at high level and have  
183 been also validated by RT-PCR and sequencing.

184 Finally, in order to assess the sensitivity threshold of RNA-seq to detect fusion  
185 transcripts, we analysed serial dilutions of two patients with *PML-RARA* and *BCR-ABL*  
186 fusion transcripts respectively. The detection threshold was below 6% for both fusion  
187 transcripts.

### 188 **Transcriptome analysis**

189 The analysis of transcriptome in the routine diagnosis procedure is technically  
190 challenging, because of interferences linked to the source of the samples analysed (e.g.  
191 bone marrow vs peripheral blood), the preparation of the samples (isolation of the  
192 mononucleated cells with Ficoll or not), the RNA extraction method, and the batch effect  
193 of library preparation and sequencing. Instead were developed signatures based on a  
194 limited number of transcripts analysed with technical platforms such as RT-MLPA<sup>19</sup> or  
195 Nanostring technology<sup>7,20</sup>. Here we assessed the feasibility of transcriptome analysis  
196 based on RNA-seq of a panel of 1385 genes.

197 First, we evaluated the magnitude of systematic biases in transcriptomic analysis  
198 introduced by the protocol of RNA extraction and the sequencing process. The same  
199 blood samples from healthy donors were extracted after Ficoll enrichment either with  
200 Trizol (n=4), or with Macherey Nagel kits (n=4). A supervised analysis based on  
201 extraction method identified 20 differentially expressed genes (fold change threshold 2,  
202 false discovery rate  $q < 0,05$ ) (Figure 3A). On the contrary, when we compared the

203 transcriptome of RNA extracted from blood samples from healthy donors, whose RNA-  
204 seq libraries and sequencing were not prepared and run the same day, there was no  
205 gene differentially expressed according to the batch of library preparation or sequencing  
206 (fold change threshold 2, false discovery rate  $q < 0,05$ , data not shown).

207 Then, we analysed bone marrow samples extracted with the same method (Trizol) from  
208 three groups with at least 3 patients: ALL with *KMT2A-AFF1* (n=7), ALL with *TCF3-PBX1*  
209 (n=4), and normal bone marrow controls (n=3). Of note, these RNA were extracted at  
210 the time of diagnosis, over a period of 19 years, introducing a potential bias due to  
211 differences in RNA conservation. Clustering of these samples in three categories (by the  
212 k-means method) distinguishes the three groups of samples according to the diagnosis,  
213 with no misclassification (Figure 3B). The analysis of the 50 most differentially  
214 expressed genes between control and both type of ALL confirmed previously described  
215 features such as *HOXA3*, *HOXA9*, *HOXA10* and *FLT3* overexpression in *KMT2A-AFF1*<sup>21</sup> and  
216 *CD19*, *WNT16* and *PBX1* up-regulation in *TCF3-PBX1* (Figure 3C)<sup>22</sup>.

217

### 218 **Detection of gene mutations.**

219 Forty five patients analysed with targeted RNA-seq were also analysed at the DNA level  
220 for a panel of 105 genes recurrently mutated in haematological malignancies<sup>9</sup>. Among  
221 the 95 genes captured in both panels, 122 mutations were detected at the DNA level in  
222 39 different genes. As shown in Figure 4, 106/122 (87%) mutations identified at the  
223 DNA level were also found in the RNA seq data. Among the 16 mutations missed at the  
224 mRNA level, frameshift mutations were overrepresented (missed mutations 11/16 vs  
225 12/106, Fischer's exact test  $p < 0.0001$ ). Two other missed mutations (I1897T and G218V  
226 from *TET2* and *U2AF1*, respectively) were in low coverage areas (<30x).

227

## 228 **Discussion**

229 This work reports the analytical performances of RNA-sequencing of a panel of 1385  
230 genes to improve the diagnosis of haematological malignancies, based on a series of 100  
231 diagnosis samples and 8 controls.

232 Overall, this technique detect 100% of fusion transcripts of these samples, including  
233 *FIP1L1-PDGFR*A fusions which often require nested PCR to be identified because of low  
234 levels of expression<sup>23</sup>. Of note, two fusion transcripts were found only by alternative  
235 bioinformatics pipelines, which highlights the major impact of the bioinformatics  
236 analysis on the performances of targeted RNA-seq. This might explain suboptimal  
237 detection of *KMT2A* and *PDGFR*A fusions in previous studies<sup>24</sup>. Interestingly, RNA-seq  
238 allowed the identification of 12 fusion transcripts which were not suspected with usual  
239 analysis recommended in the diagnosis of haematological malignancies<sup>25</sup>. As more and  
240 more case reports describe successful opportunistic use of targeted therapies in patients  
241 with fusion transcripts<sup>26-28</sup>, the identification of unexpected fusion transcripts might  
242 offer interesting targets in relapsed/refractory patients. In the series reported here, the  
243 patient with an hypereosinophilic syndrome associated with the novel *EEA1-PDGFR*B  
244 fusion was treated with imatinib and achieved a durable haematological remission.  
245 Moreover, as translocations are most of the time drivers events which are stable during  
246 disease evolution<sup>30</sup>, they can be used to track minimal residual disease with high  
247 sensitivity RT-qPCR, and adapt therapeutic intensity accordingly. However, it remains to  
248 be determined if the prognostic impact of minimal residual disease described for CBF  
249 AML<sup>31</sup>, CML, or APL is also true for the less recurrent fusion transcripts.

250 Regarding the analysis of the transcriptomic profile, we show that targeted  
251 transcriptome analysis can be used for nosological purposes if the pre-analytical  
252 workflow is the same for the samples analysed. Larger series are needed to precise the

253 performances of targeted RNA-seq to resolve this task. Another interesting question  
254 would be to assess the performances of targeted RNA-seq to measure clinically relevant  
255 signatures such as the LSC17<sup>7</sup> or the more recently described pLSC6<sup>32</sup> signatures in  
256 AML, but it will need an optimization of the design of the panel to capture all relevant  
257 mRNAs.

258 The third clinical interest of targeted RNA-seq assessed here is the detection of acquired  
259 somatic mutations. Even if most of the mutations identified at the DNA level were found  
260 in RNA-seq data, the nonsense mutations were rarely detected. This is probably at least  
261 in part due to the phenomenon of mRNA decay, which degrades preferentially truncated  
262 mRNA<sup>33</sup>, and this will remain a biological limitation of RNA-seq for mutation assessment.  
263 Finally, given the growing importance of clonal architecture analysis based on variant  
264 allele frequency (VAF) deconvolution<sup>34</sup>, we should keep in mind that the VAF measured  
265 at the mRNA level might not be good surrogate markers of clonal architecture, because it  
266 takes into account allelic expression bias.

267 Altogether, RNA-seq of a targeted panel of genes might improve the diagnosis of  
268 haematological malignancies, and highlight potential therapeutic targets. Some of the  
269 limitations of this technique might be resolved with the optimization of the panel design  
270 and the bioinformatics pipelines for haematological malignancies. However, because  
271 some limitations have a biological explanation, such as poor performances to detect non-  
272 sense mutations, RNA-seq should not replace the analysis of genomic DNA, but could be  
273 rather a good orthogonal method for verifying genomic mutations and a powerful  
274 complement to increase the molecular characterisation of haematologic malignancies at  
275 diagnosis.

276

277

278 **Figure legends**

279 **Figure 1:** Description of the 72 fusion transcripts detected by targeted-RNAseq in the  
280 whole cohort.

281

282 **Figure 2:** Description of the three new fusion transcripts discovered in this cohort.

283 Schematic representation of the 3 new fusion transcripts identified by targeted RNAseq :

284 *FUS-FEV* from t(2;16) (A), *EEA1-PDGFRB* from t(5;12) (B) and *VWC2-IKZF1* (C). For each

285 fusion transcript is provided a schematic representation of the translocation at the

286 genomic level, a graphical representation of the coverage depth in the targeted RNA-seq,

287 and a schematic representation of the protein fusion.

288

289 **Figure 3:** A: Heatmap representation of the 20 genes differentially expressed (fold

290 change >2, q value <0,05) between the same control blood samples after RNA extraction

291 with two different methods (trizol vs Macherey Nagel). B: Principal component analysis

292 and unsupervised k-means clustering of 14 samples processed with the same

293 preanalytical steps (*KMT2A-AFF1* ALL, white dots, n=7, *TCF3-PBX1* ALL, yellow dots,

294 n=4, normal bone marrow samples, purple dots, n=3). C: Heatmaps showing the 50 most

295 differentially expressed genes between normal samples and *KMT2A-AFF1* ALL samples

296 (left) and between normal samples and *TCF3-PBX1* ALL samples (right).

297 **Figure 4:** Performances of somatic mutations detection based on RNA-seq analysis. The

298 relative number of mutations correctly identified or undetected (non-sense, low

299 coverage or other) are presented.

300

301

302

303 **Supplemental Table 1:** Characteristics of the samples included in the study.

304 **Supplemental Table 2:** Sequences of the primers used to validate the fusion  
305 transcripts.

306 **Supplemental Table 3:** List of gene mutations identified by DNA sequencing which  
307 were analysed on RNA-seq data.

## 308 **References**

- 309 1. Swerdlow SH, Campo E, Pileri SA, Harris NL, Stein H, Siebert R, Advani R,  
310 Ghielmini M, Salles GA, Zelenetz AD, Jaffe ES. The 2016 revision of the World Health  
311 Organization classification of lymphoid neoplasms. *Blood*, 2016, 127:2375–90  
312
- 313 2. Döhner H, Estey E, Grimwade D, Amadori S, Appelbaum FR, Büchner T, Dombret  
314 H, Ebert BL, Fenaux P, Larson RA, Levine RL, Lo-Coco F, Naoe T, Niederwieser D,  
315 Ossenkoppele GJ, Sanz M, Sierra J, Tallman MS, Tien H-F, Wei AH, Löwenberg B,  
316 Bloomfield CD. Diagnosis and management of AML in adults: 2017 ELN  
317 recommendations from an international expert panel. *Blood*, 2017, 129:424–47  
318
- 319 3. The ICGC/TCGA Pan-Cancer Analysis of Whole Genomes Consortium. Pan-cancer  
320 analysis of whole genomes. *Nature*, 2020, 578:82–93  
321
- 322 4. Corces MR, Buenrostro JD, Wu B, Greenside PG, Chan SM, Koenig JL, Snyder MP,  
323 Pritchard JK, Kundaje A, Greenleaf WJ, Majeti R, Chang HY. Lineage-specific and single-  
324 cell chromatin accessibility charts human hematopoiesis and leukemia evolution. *Nat*  
325 *Genet*, 2016, 48:1193–203  
326
- 327 5. Yi G, Wierenga ATJ, Petraglia F, Narang P, Janssen-Megens EM, Mandoli A, Merkel  
328 A, Berentsen K, Kim B, Matarese F, Singh AA, Habibi E, Prange KHM, Mulder AB, Jansen  
329 JH, Clarke L, Heath S, van der Reijden BA, Flicek P, Yaspo M-L, Gut I, Bock C, Schuringa JJ,  
330 Altucci L, Vellenga E, Stunnenberg HG, Martens JHA. Chromatin-Based Classification of  
331 Genetically Heterogeneous AMLs into Two Distinct Subtypes with Diverse Stemness  
332 Phenotypes. *Cell Reports*, 2019, 26:1059-1069.e6  
333
- 334 6. Alizadeh AA, Eisen MB, Davis RE, Ma C, Lossos IS, Rosenwald A, Boldrick JC, Sabet  
335 H, Tran T, Yu X, Powell JJ, Yang L, Marti GE, Moore T, Hudson J Jr, Lu L, Lewis DB,  
336 Tibshirani R, Sherlock G, Chan WC, Greiner TC, Weisenburger DD, Armitage JO, Warnke  
337 R, Levy R, Wilson W, Grever MR, Byrd JC, Botstein D, Brown PO, Staudt LM. Distinct types  
338 of diffuse large B-cell lymphoma identified by gene expression profiling. *Nature*, 2000,  
339 403:503–11  
340
- 341 7. Ng SWK, Mitchell A, Kennedy JA, Chen WC, McLeod J, Ibrahimova N, Arruda A,  
342 Popescu A, Gupta V, Schimmer AD, Schuh AC, Yee KW, Bullinger L, Herold T, Görlich D,  
343 Büchner T, Hiddemann W, Berdel WE, Wörmann B, Cheok M, Preudhomme C, Dombret  
344 H, Metzeler K, Buske C, Löwenberg B, Valk PJM, Zandstra PW, Minden MD, Dick JE, Wang  
345 JCY. A 17-gene stemness score for rapid determination of risk in acute leukaemia.



- 346 Nature, 2016, 540:433–7  
347
- 348 8. Australian Pancreatic Cancer Genome Initiative, ICGC Breast Cancer Consortium,  
349 ICGC MMML-Seq Consortium, ICGC PedBrain, Alexandrov LB, Nik-Zainal S, Wedge DC,  
350 Aparicio SAJR, Behjati S, Biankin AV, Bignell GR, Bolli N, Borg A, Børresen-Dale A-L,  
351 Boyault S, Burkhardt B, Butler AP, Caldas C, Davies HR, Desmedt C, Eils R, Eyfjörd JE,  
352 Foekens JA, Greaves M, Hosoda F, Hutter B, Ilicic T, Imbeaud S, Imielinski M, Jäger N,  
353 Jones DTW, Jones D, Knappskog S, Kool M, Lakhani SR, et al. Signatures of mutational  
354 processes in human cancer. *Nature*, 2013, 500:415–21  
355
- 356 9. Huet S, Paubelle E, Lours C, Grange B, Courtois L, Chabane K, Charlot C, Mosnier I,  
357 Simonet T, Hayette S, Tigaud I, Thomas X, Salles G, Subtil F, Sujobert P. Validation of the  
358 prognostic value of the knowledge bank approach to determine AML prognosis in real  
359 life. *Blood*, 2018, 132:865–7  
360
- 361 10. Haas BJ, Dobin A, Li B, Stransky N, Pochet N, Regev A. Accuracy assessment of  
362 fusion transcript detection via read-mapping and de novo fusion transcript assembly-  
363 based methods. *Genome Biol*, 2019, 20:213  
364
- 365 11. Ewels PA, Peltzer A, Fillinger S, Patel H, Alneberg J, Wilm A, Garcia MU, Di  
366 Tommaso P, Nahnsen S. The nf-core framework for community-curated bioinformatics  
367 pipelines. *Nat Biotechnol*, 2020. <https://doi.org/10.1038/s41587-020-0439-x>  
368
- 369 12. Garrison E, Marth G. Haplotype-based variant detection from short-read  
370 sequencing. *ArXiv:12073907 [q-Bio]*, 2012  
371
- 372 13. Koboldt DC, Zhang Q, Larson DE, Shen D, McLellan MD, Lin L, Miller CA, Mardis  
373 ER, Ding L, Wilson RK. VarScan 2: somatic mutation and copy number alteration  
374 discovery in cancer by exome sequencing. *Genome Res*, 2012, 22:568–76  
375
- 376 14. Karczewski KJ, Francioli LC, Tiao G, Cummings BB, Alföldi J, Wang Q, Collins RL,  
377 Laricchia KM, Ganna A, Birnbaum DP, Gauthier LD, Brand H, Solomonson M, Watts NA,  
378 Rhodes D, Singer-Berk M, Seaby EG, Kosmicki JA, Walters RK, Tashman K, Farjoun Y,  
379 Banks E, Poterba T, Wang A, Seed C, Whiffin N, Chong JX, Samocha KE, Pierce-Hoffman E,  
380 Zappala Z, O'Donnell-Luria AH, Minikel EV, Weisburd B, Lek M, Ware JS, et al. Variation  
381 across 141,456 human exomes and genomes reveals the spectrum of loss-of-function  
382 intolerance across human protein-coding genes. *Genomics*, 2019.  
383 <https://doi.org/10.1101/531210>  
384
- 385 15. Plesa A, Sujobert P. Cannibalistic acute myeloid leukemia with ZMYND11-MBTD1  
386 fusion. *Blood*, 2019, 133:1789–1789  
387
- 388 16. Martinelli G, Iacobucci I, Storlazzi CT, Vignetti M, Paoloni F, Cilloni D, Soverini S,  
389 Vitale A, Chiaretti S, Cimino G, Papayannidis C, Paolini S, Elia L, Fazi P, Meloni G, Amadori  
390 S, Saglio G, Pane F, Baccarani M, Foà R. *IKZF1* (Ikaros) Deletions in *BCR-ABL1* -Positive  
391 Acute Lymphoblastic Leukemia Are Associated With Short Disease-Free Survival and  
392 High Rate of Cumulative Incidence of Relapse: A GIMEMA AL WP Report. *JCO*, 2009,  
393 27:5202–7  
394



- 395 17. Mullighan CG, Su X, Zhang J, Radtke I, Phillips LAA, Miller CB, Ma J, Liu W, Cheng C,  
396 Schulman BA, Harvey RC, Chen I-M, Clifford RJ, Carroll WL, Reaman G, Bowman WP,  
397 Devidas M, Gerhard DS, Yang W, Relling MV, Shurtleff SA, Campana D, Borowitz MJ, Pui  
398 C-H, Smith M, Hunger SP, Willman CL, Downing JR. Deletion of *IKZF1* and Prognosis in  
399 Acute Lymphoblastic Leukemia. *New England Journal of Medicine*, 2009, 360:470–80  
400
- 401 18. Babiceanu M, Qin F, Xie Z, Jia Y, Lopez K, Janus N, Facemire L, Kumar S, Pang Y, Qi  
402 Y, Lazar IM, Li H. Recurrent chimeric fusion RNAs in non-cancer tissues and cells. *Nucleic  
403 Acids Res*, 2016, 44:2859–72  
404
- 405 19. Mareschal S, Ruminy P, Bagacean C, Marchand V, Cornic M, Jais J-P, Figeac M,  
406 Picquenot J-M, Molina TJ, Fest T, Salles G, Haioun C, Leroy K, Tilly H, Jardin F. Accurate  
407 Classification of Germinal Center B-Cell-Like/Activated B-Cell-Like Diffuse Large B-Cell  
408 Lymphoma Using a Simple and Rapid Reverse Transcriptase–Multiplex Ligation-  
409 Dependent Probe Amplification Assay. *The Journal of Molecular Diagnostics*, 2015,  
410 17:273–83  
411
- 412 20. Huet S, Tesson B, Jais J-P, Feldman AL, Magnano L, Thomas E, Traverse-Glehen A,  
413 Albaud B, Carrère M, Xerri L, Ansell SM, Baseggio L, Reyes C, Tarte K, Boyault S, Haioun  
414 C, Link BK, Feugier P, Lopez-Guillermo A, Tilly H, Brice P, Hayette S, Jardin F, Offner F,  
415 Sujobert P, Gentien D, Viari A, Campo E, Cerhan JR, Salles G. A gene-expression profiling  
416 score for prediction of outcome in patients with follicular lymphoma: a retrospective  
417 training and validation analysis in three international cohorts. *The Lancet Oncology*,  
418 2018, 19:549–61  
419
- 420 21. Armstrong SA, Staunton JE, Silverman LB, Pieters R, den Boer ML, Minden MD,  
421 Sallan SE, Lander ES, Golub TR, Korsmeyer SJ. MLL translocations specify a distinct gene  
422 expression profile that distinguishes a unique leukemia. *Nat Genet*, 2002, 30:41–7  
423
- 424 22. Diakos C, Xiao Y, Zheng S, Kager L, Dworzak M, Wiemels JL. Direct and Indirect  
425 Targets of the E2A-PBX1 Leukemia-Specific Fusion Protein. *PLoS ONE*, 2014, 9:e87602  
426
- 427 23. and The French Eosinophil Network, Roche-Lestienne C, Lepers S, Soenen-Cornu  
428 V, Kahn J-E, Lai J-L, Hachulla E, Drupt F, Demarty A-L, Roumier A-S, Gardembas M, Dib M,  
429 Philippe N, Cambier N, Barete S, Libersa C, Bletry O, Hatron P-Y, Quesnel B, Rose C,  
430 Maloum K, Blanchet O, Fenaux P, Prin L, Preudhomme C. Molecular characterization of  
431 the idiopathic hypereosinophilic syndrome (HES) in 35 French patients with normal  
432 conventional cytogenetics. *Leukemia*, 2005, 19:792–8  
433
- 434 24. Stengel A, Nadarajah N, Haferlach T, Dicker F, Kern W, Meggendorfer M, Haferlach  
435 C. Detection of recurrent and of novel fusion transcripts in myeloid malignancies by  
436 targeted RNA sequencing. *Leukemia*, 2018, 32:1229–38  
437
- 438 25. SH S, E C, NL H, ES J, SA P, H S, J T. WHO Classification of Tumours of  
439 Haematopoietic and Lymphoid Tissues. n.d.  
440
- 441 26. Jan M, Grinshpun DE, Villalba JA, Dal Cin P, Sykes DB, Iafrate AJ, Ebert BL, Hobbs  
442 GS, Nardi V. A cryptic imatinib-sensitive G3BP1-PDGFRB rearrangement in a myeloid  
443 neoplasm with eosinophilia. *Blood Advances*, 2020, 4:445–8

- 444  
445 27. Tanasi I, Ba I, Sirvent N, Braun T, Cuccuini W, Ballerini P, Duployez N, Tanguy-  
446 Schmidt A, Tamburini J, Maury S, Doré E, Himberlin C, Duclos C, Chevallier P, Rousselot  
447 P, Bonifacio M, Cavé H, Baruchel A, Dombret H, Soulier J, Landman-Parker J, Boissel N,  
448 Clappier E. Efficacy of tyrosine kinase inhibitors in Ph-like acute lymphoblastic leukemia  
449 harboring ABL-class rearrangements. *Blood*, 2019, 134:1351–5  
450  
451 28. Decool G, Domenech C, Grardel N, Plesa A, Raczkiwicz I, Ducourneau B, Ruminy  
452 P, Pages M-P, Girard S, Fenwarth L, Preudhomme C, Bertrand Y, Duployez N. Efficacy of  
453 Tyrosine Kinase Inhibitor Therapy in a Chemotherapy-refractory B-cell Precursor Acute  
454 Lymphoblastic Leukemia With ZC3HAV1-ABL2 Fusion: *HemaSphere*, 2019, 3:e193  
455  
456 29. Panagopoulos I, Brunetti M, Stoltenberg M, Strandabø RAU, Staurseth J, Andersen  
457 K, Kostolomov I, Hveem TS, Lorenz S, Nystad TA, Flægstad T, Micci F, Heim S. Novel  
458 GTF2I-PDGFRB and IKZF1-TYW1 fusions in pediatric leukemia with normal karyotype.  
459 *Exp Hematol Oncol*, 2019, 8:12  
460  
461 30. Papaemmanuil E, Gerstung M, Bullinger L, Gaidzik VI, Paschka P, Roberts ND,  
462 Potter NE, Heuser M, Thol F, Bolli N, Gundem G, Van Loo P, Martincorena I, Ganly P,  
463 Mudie L, McLaren S, O'Meara S, Raine K, Jones DR, Teague JW, Butler AP, Greaves MF,  
464 Ganser A, Döhner K, Schlenk RF, Döhner H, Campbell PJ. Genomic Classification and  
465 Prognosis in Acute Myeloid Leukemia. *New England Journal of Medicine*, 2016,  
466 374:2209–21  
467  
468 31. Jourdan E, Boissel N, Chevret S, Delabesse E, Renneville A, Cornillet P, Blanchet O,  
469 Cayuela J-M, Recher C, Raffoux E, Delaunay J, Pigneux A, Bulabois C-E, Berthon C, Pautas  
470 C, Vey N, Lioure B, Thomas X, Luquet I, Terré C, Guardiola P, Béné MC, Preudhomme C,  
471 Ifrah N, Dombret H. Prospective evaluation of gene mutations and minimal residual  
472 disease in patients with core binding factor acute myeloid leukemia. *Blood*, 2013,  
473 121:2213–23  
474  
475 32. Elsayed AH, Rafiee R, Cao X, Raimondi S, Downing JR, Ribeiro R, Fan Y, Gruber TA,  
476 Baker S, Klco J, Rubnitz JE, Pounds S, Lamba JK. A six-gene leukemic stem cell score  
477 identifies high risk pediatric acute myeloid leukemia. *Leukemia*, 2020, 34:735–45  
478  
479 33. Maquat LE. Nonsense-mediated mRNA decay: splicing, translation and mRNP  
480 dynamics. *Nat Rev Mol Cell Biol*, 2004, 5:89–99  
481  
482 34. Itzykson R, Duployez N, Fasan A, Decool G, Marceau-Renaut A, Meggendorfer M,  
483 Jourdan E, Petit A, Lapillonne H, Micol J-B, Cornillet-Lefebvre P, Ifrah N, Leverger G,  
484 Dombret H, Boissel N, Haferlach T, Preudhomme C. Clonal interference of signaling  
485 mutations worsens prognosis in core-binding factor acute myeloid leukemia. *Blood*,  
486 2018, 132:187–96  
487  
488

Figure 1

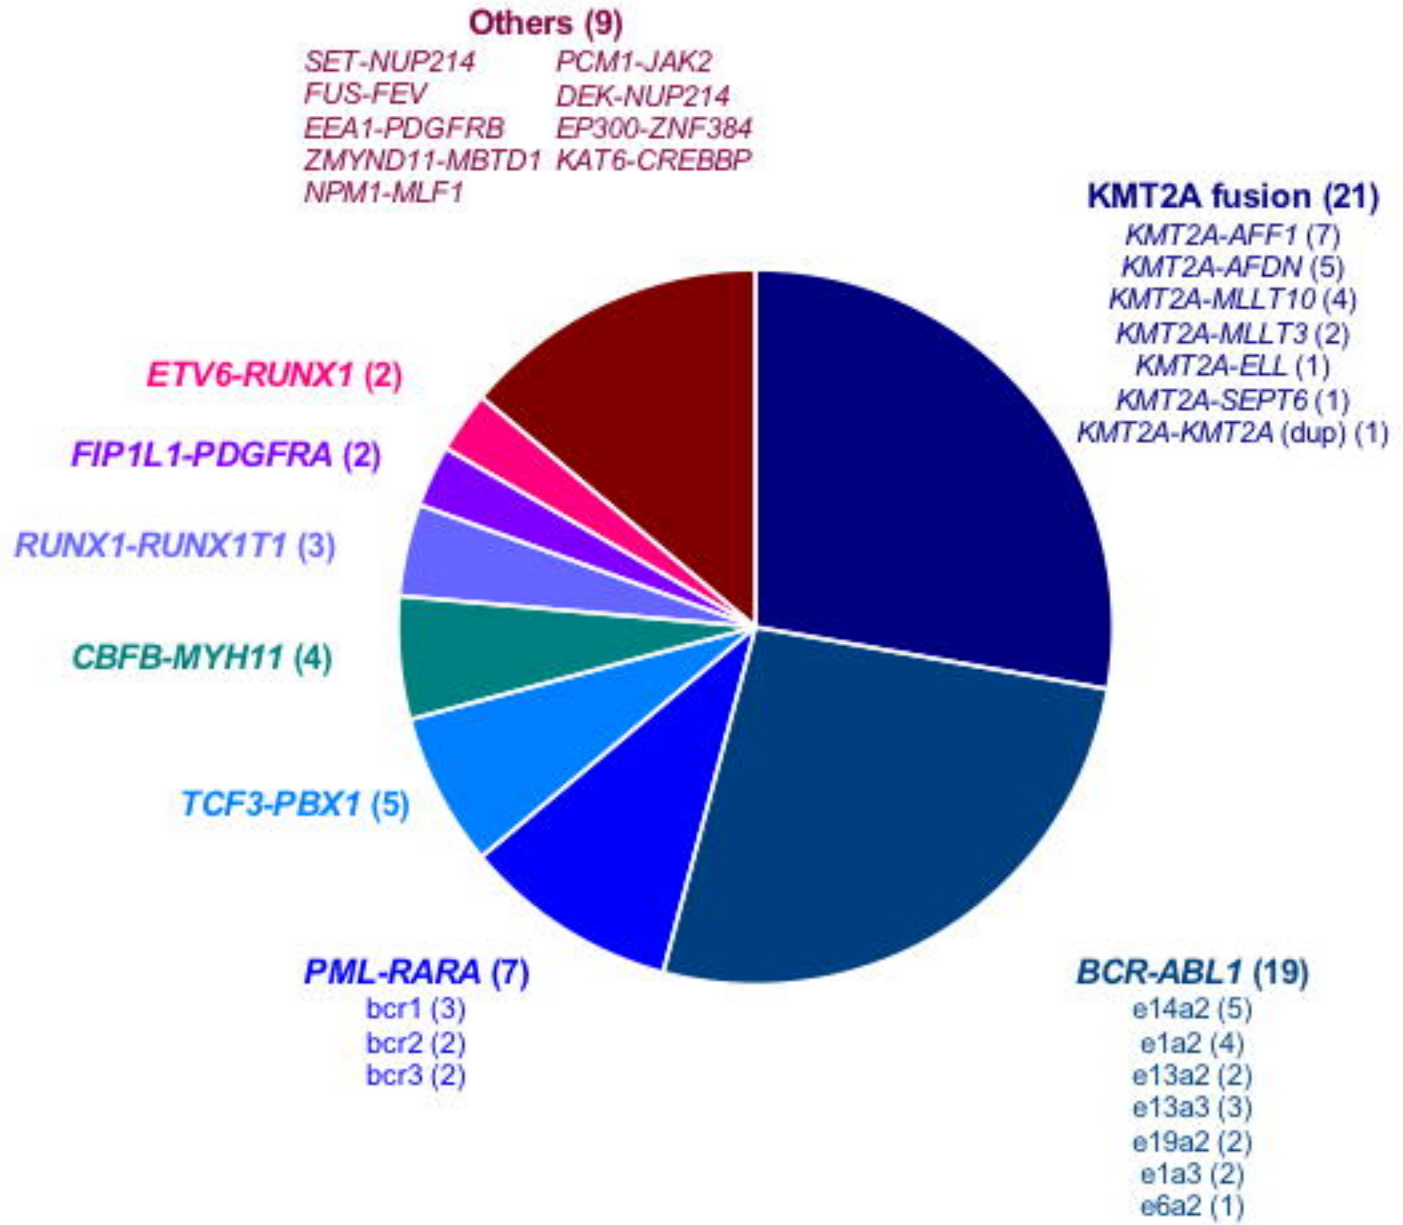

Figure 2 continued

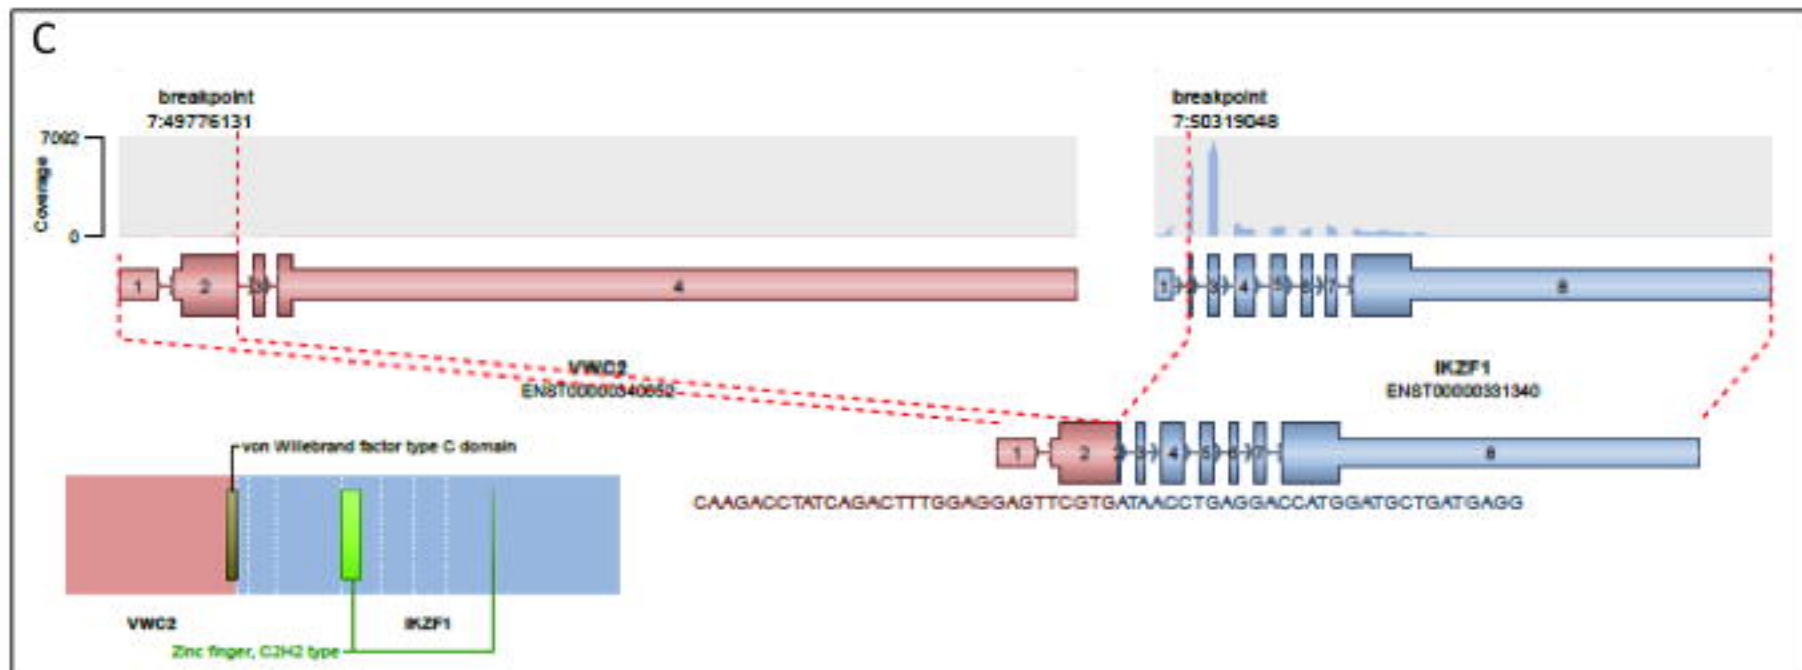

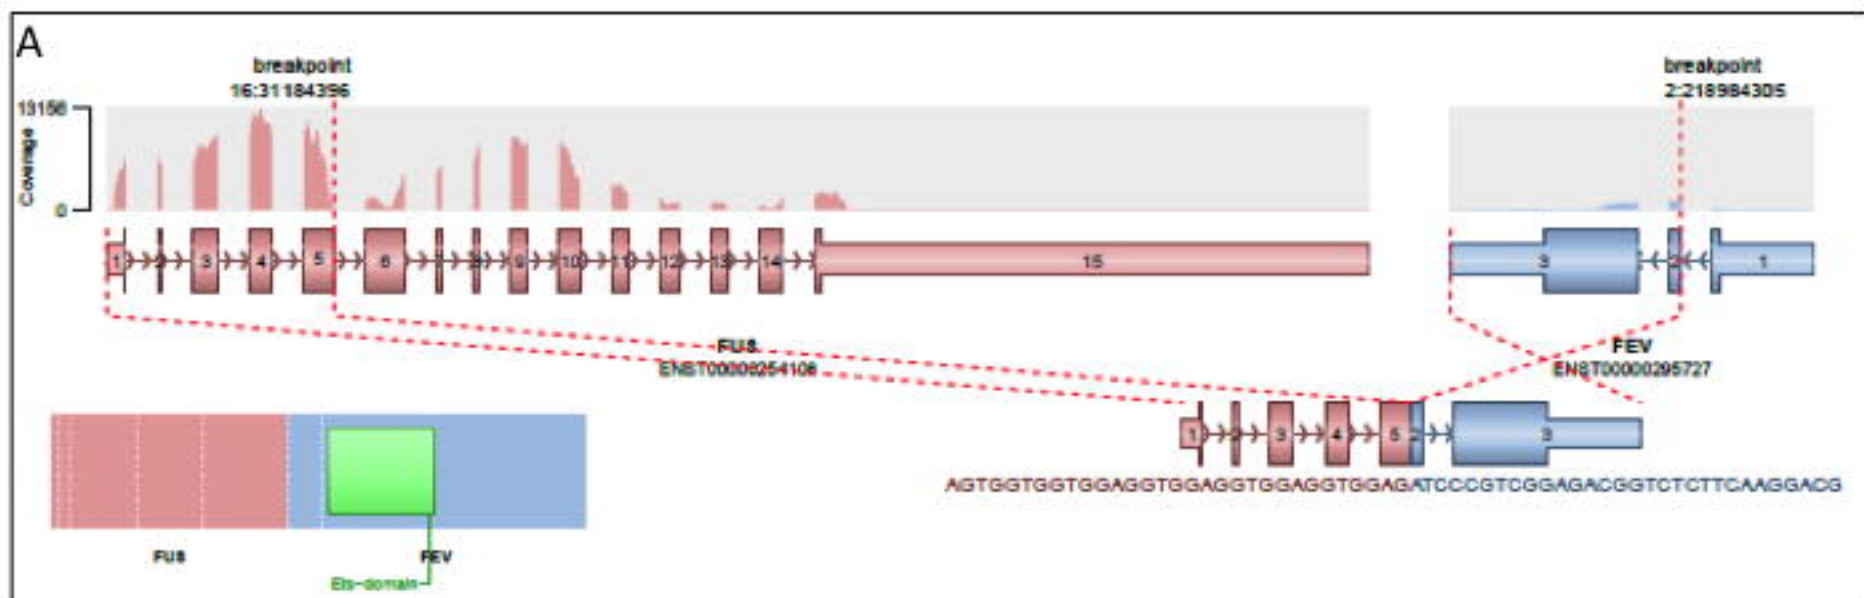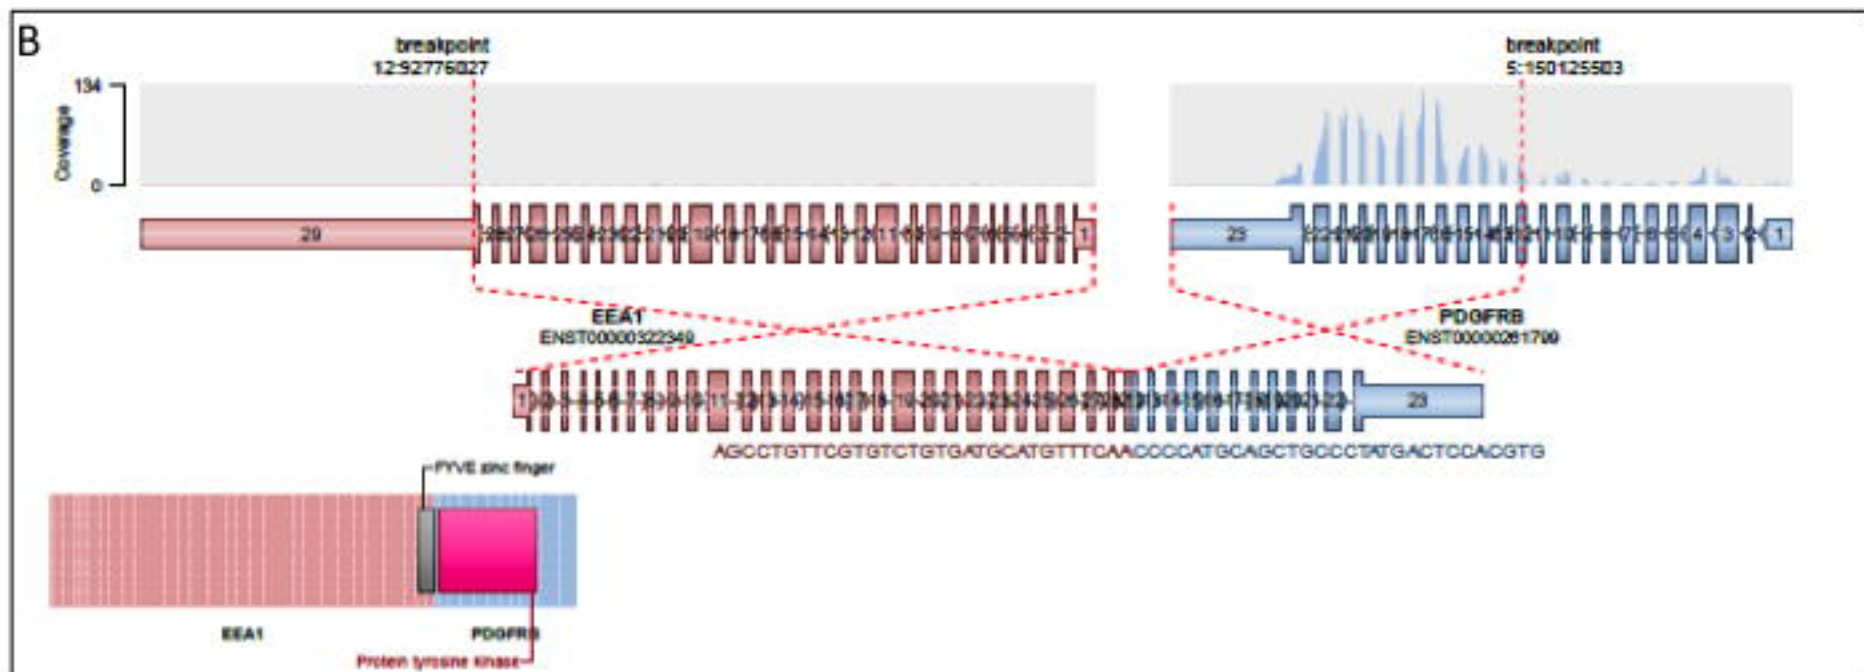



Figure 3

A

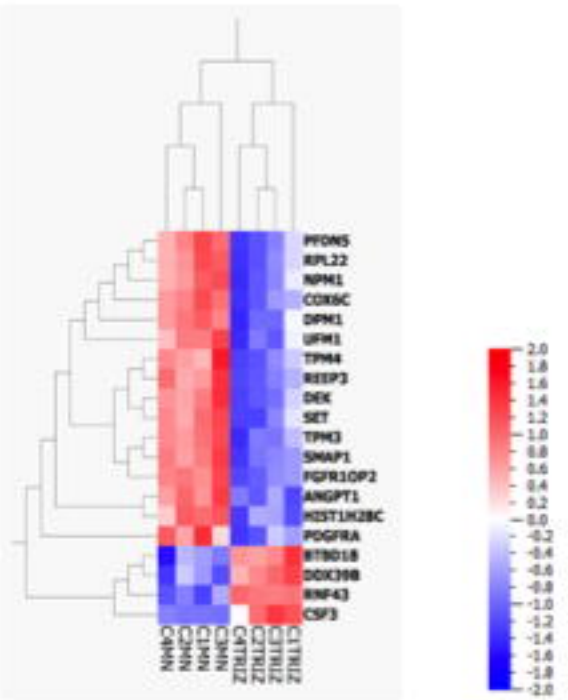

B

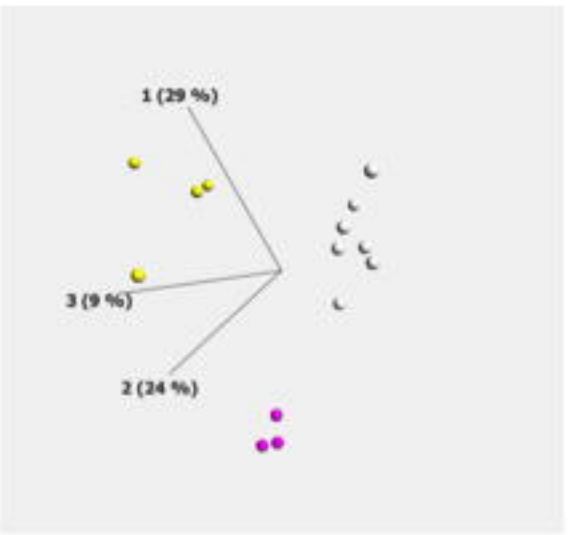

C

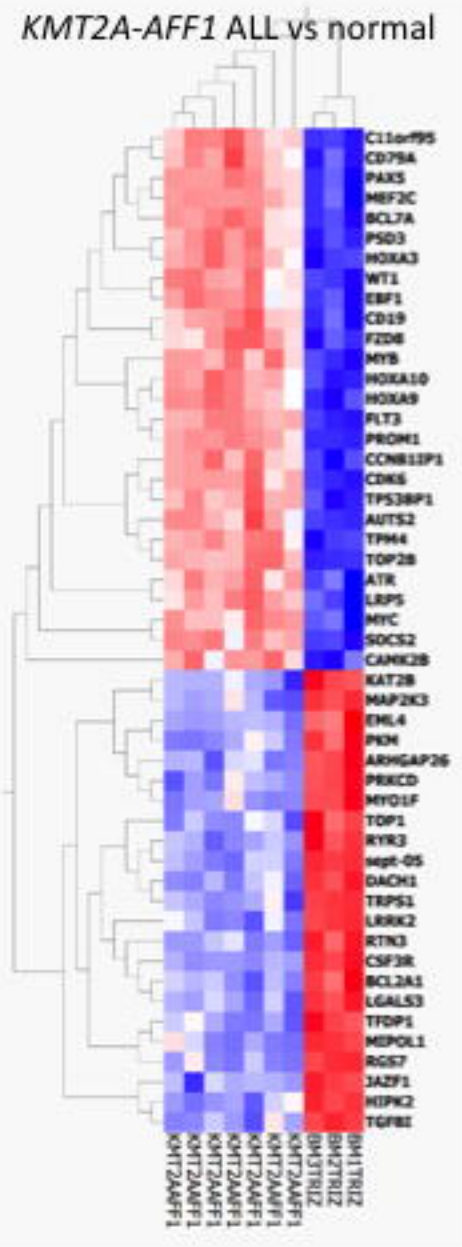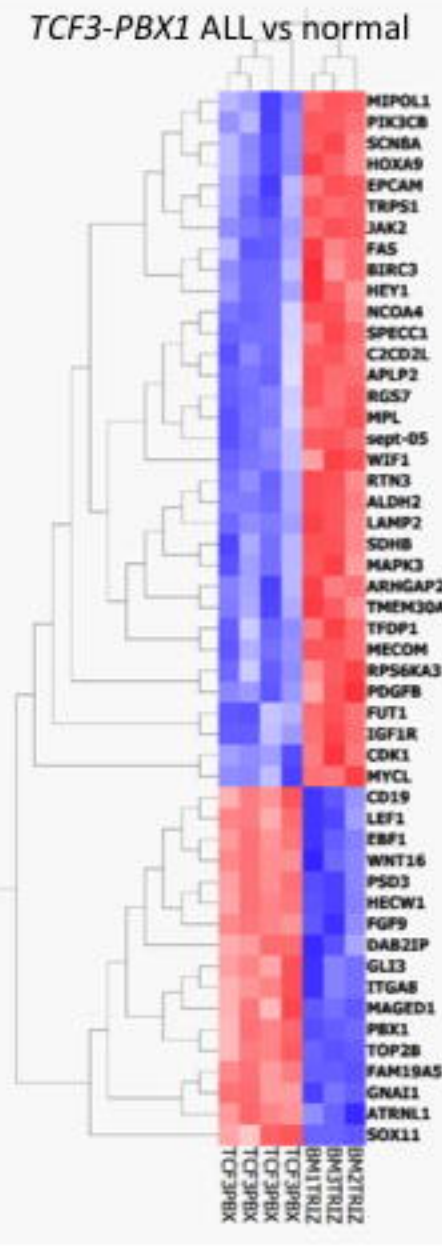

Figure 4

### Detection of gene mutations

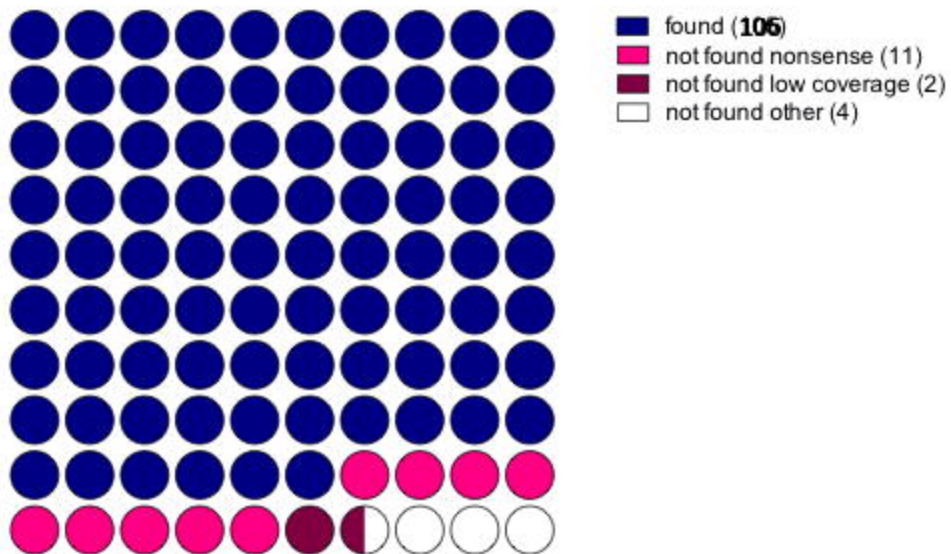

Source: https://www.biorxiv.org/content/10.1101/2020.09.07.285981v1.full.pdf
